# Supplementary material
Source: MDPI journal article supplement (https://www.mdpi.com/2073-4344/14/1/54)
Supplement: s1 [file s1]

## Supplementary Materials

**Table S1** shows the surface, pore volume, and Ni nanoparticle content of the unmodified Ni/BC catalysts and the sulfuric acid activated biochar catalyst. **Figure S1** shows the TEM morphology of the catalyst surface, structure, the size of nickel nanoparticles and their distribution on the surface of Ni/BC catalyst following sulfuric acid activation of biochar itself. The chemical structure and function groups on the surface of the developed catalyst (Ni/BC) based on FTIR is shown in **Figure S2**. CO<sub>2</sub>-TPD profile is shown in **Figure S3**.

**Table S1.** Surface area, pore volume and Ni nanoparticle content. .

| Catalyst                                              | Surface Area<br>(m <sup>2</sup> g <sup>-1</sup> ) | Pore Volume<br>(cm <sup>3</sup> g <sup>-1</sup> ) | Ni Content (%) |
|-------------------------------------------------------|---------------------------------------------------|---------------------------------------------------|----------------|
| Ni/BC                                                 | 74.8                                              | 0.1                                               | 15.1           |
| Ni/BC (H <sub>2</sub> SO <sub>4</sub> acid activated) | 353.5                                             | 0.3                                               | 14.7           |

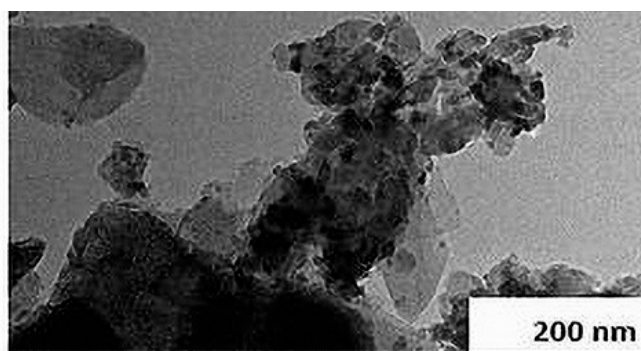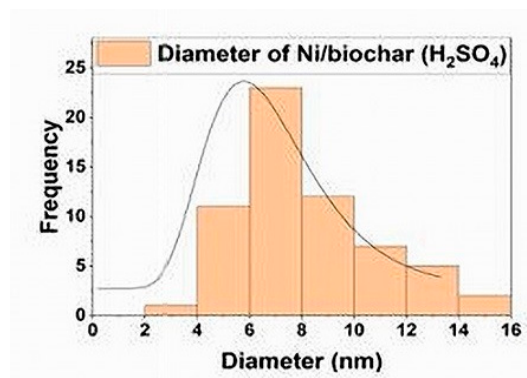

**Figure S1.** TEM analysis and histograms of the Ni metal nanoparticle sizes of Ni/BC.

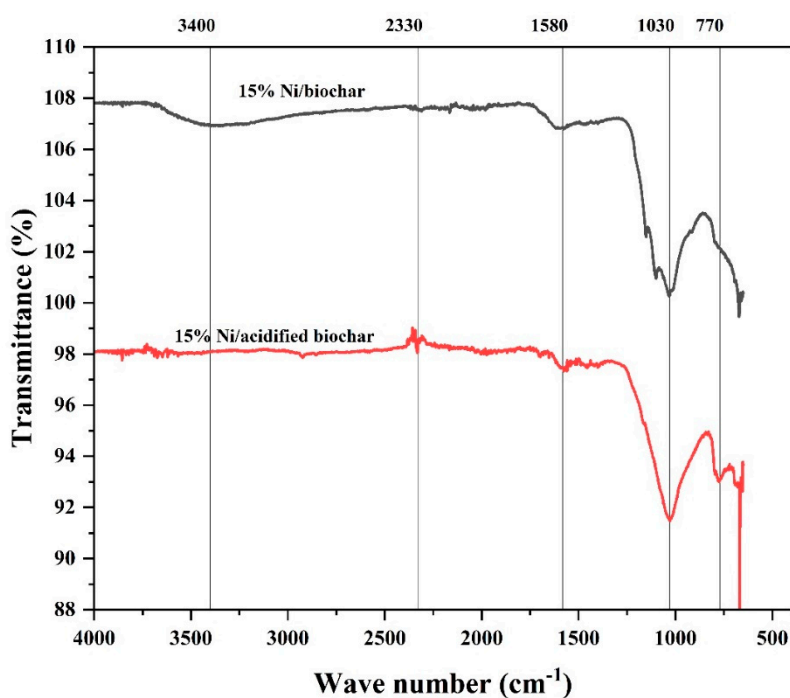

**Figure S2.** FT-IR spectra of biochar and biochar (H<sub>2</sub>SO<sub>4</sub>), and their corresponding Ni catalysts.

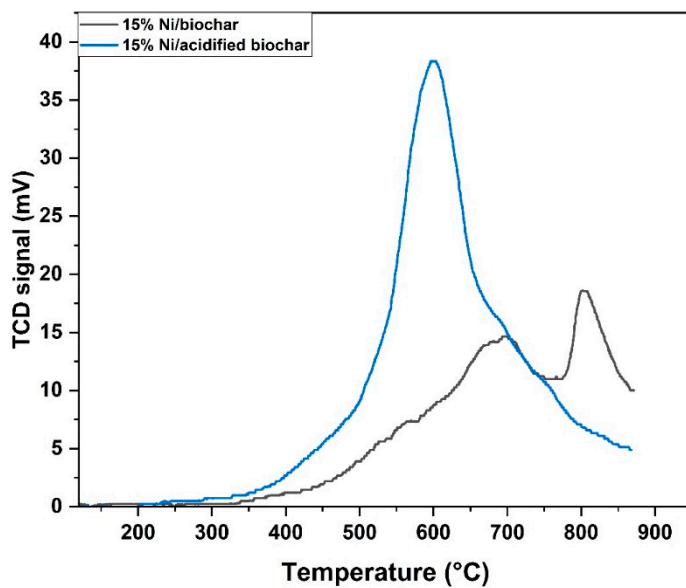

**Figure S3.** CO<sub>2</sub>-TPD profile of raw Ni/biochar and sulfuric acid activated biochar Ni/BC catalysts.

## References

Data in this Supplementary Information section have been reproduced from

1. Mudi, I.; Hart, A.; Ingram, A.; Wood, J. Catalytic hydrodeoxygenation of vanillin, a bio-oil model compound over renewable Ni/biochar catalyst. *Catalysts* **2023**, *13*, 171.
